# Supplementary material
Source: publisher figshare collection journal article supplement (https://tandf.figshare.com/articles/dataset/_/16574441)
Supplement: Supplementary file 1 [file 2]

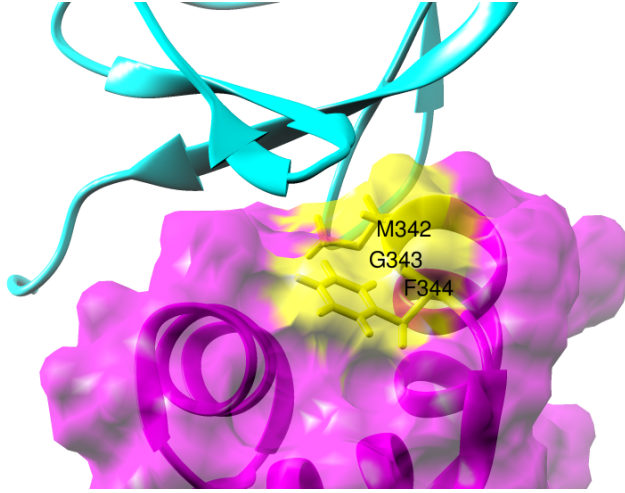

Figure S1: Detailed surface view of UBA domain of Dsk2p protein complexed with ubiquitin (PDB ID: 1WR1). Residues M342, G343, and F344 are well conserved in the UBA domains and form the hydrophobic core of the large surface patch for interacting with ubiquitin.

|          | BeAtMuSiC        | mCSM-PPI2        |            | BeAtMuSiC        | mCSM-PPI2        |
|----------|------------------|------------------|------------|------------------|------------------|
|          | $\Delta\Delta G$ | $\Delta\Delta G$ |            | $\Delta\Delta G$ | $\Delta\Delta G$ |
| SARS-CoV | (kcal/mol)       | (kcal/mol)       | SARS-CoV-2 | (kcal/mol)       | (kcal/mol)       |
| N479E    | 0.86             | 0.805            | Q493E      | 1.37             | 0.092            |
| N479K    | 0.66             | 1.448            | Q493K      | 1.06             | 0.808            |
| N479Q    | 0.57             | 0.743            | Q493N      | 1.36             | -0.497           |
| N479R    | 0.29             | 0.797            | Q493R      | 0.76             | 0.552            |
| N479S    | 0.91             | -0.610           | Q493S      | 1.86             | -0.509           |
| G482A    | 0.67             | 0.858            | G496A      | 0.84             | 0.829            |
| G482D    | 1.15             | -1.466           | G496D      | 0.65             | -0.910           |
| G482V    | 0.40             | 0.838            | G496V      | 0.70             | 1.174            |
| Y484F    | 0.45             | 0.872            | Q498F      | -0.42            | 0.466            |
| Y484H    | 1.17             | 1.670            | Q498H      | 0.13             | 0.415            |
| Y484N    | 1.94             | -0.333           | Q498N      | 0.69             | -1.103           |
| Y484Q    | 1.65             | 1.605            | Q498Y      | -0.14            | -1.961           |
| Y484T    | 1.64             | 1.581            | Q498T      | 0.39             | 1.363            |

Table S1: Changes in binding affinity of human SARS-CoV and human SARS-CoV-2 spike RBD complexed with hACE2 upon mutation as predicted by BeAtMuSiC and mCSM-PPI2.

| Name                                   | Spike<br>Glycoprotein<br>GenBank | Name                    | Spike<br>Glycoprotein<br>GenBank | Name                                       | Spike<br>Glycoprotein<br>GenBank |
|----------------------------------------|----------------------------------|-------------------------|----------------------------------|--------------------------------------------|----------------------------------|
| SARS-CoV-Tor2                          | AAP41037.1                       | SARS-CoV PC4-115        | AAV49719.1                       | Rhinolophus affinis CoV LYRa3 (SARS-like)  | AHX37569.1                       |
| SARS-CoV BJ01                          | AAP30030.1                       | SARS-CoV PC4-145        | AAV49721.1                       | Rhinolophus affinis CoV LYRa11 (SARS-like) | AHX37558.1                       |
| SARS-CoV CUHK-W1                       | AAP13567.1                       | SARS-CoV PC4-241        | AAV49723.1                       | Bat SARS-like CoV Rs3367                   | AGZ48818.1                       |
| SARS-CoV Urbani                        | AAP13441.1                       | SARS-CoV civet014       | AAU04661.1                       | Bat SARS-like CoV Rs4874                   | ATO98205.1                       |
| SARS-CoV Frankfurt-1                   | AAP33697.1                       | SARS-CoV PC4-137        | AAV49720.1                       | Bat SARS-like CoV WIV1                     | AGZ48828.1                       |
| SARS-CoV CUHK-AG01                     | AAP94737.1                       | SARS-CoV civet020       | AAU04664.1                       | SARS-like CoV WIV16                        | ALK02457.1                       |
| SARS-CoV TW6                           | AAR87567.1                       | SARS-CoV PC4-127        | AAU93318.1                       | Bat SARS CoV RaTG13                        | QHR63300.2                       |
| SARS-CoV TW11                          | AAR87512.1                       | SARS-CoV B039           | AAV97993.1                       | Bat SARS-like CoV Rs7327                   | ATO98218.1                       |
| SARS-CoV HKU-39849                     | ADC35483.1                       | SARS-CoV PC4-205        | AAU93319.1                       | Bat SARS-like CoV Rs9401                   | ATO98231.1                       |
| SARS-CoV-2 Wuhan-Hu-1                  | QHD43416.1                       | SARS-CoV PC4-199        | AAV49722.1                       | CoV BtRs-BetaCoV/YN2018B                   | QDF43825.1                       |
| SARS-CoV-2 CA-CDC-0139                 | QJV58828.1                       | SARS-CoV civet010       | AAU04649.1                       | Bat SARS-like CoV RsSHC014                 | AGZ48806.1                       |
| SARS-CoV-2 France                      | QJT72590.1                       | SARS-CoV civet019       | AAU04662.1                       | Bat SARS-like CoV Rs4084                   | ATO98132.1                       |
| SARS-CoV-2 WHUHuCoV011                 | QIU82034.1                       | SARS-CoV A022           | AAV91631.1                       | Bat SARS-like CoV Rs4231                   | ATO98157.1                       |
| SARS-CoV-2 CA-CZB-1248                 | QKE49268.1                       | Civet SARS-CoV 007/2004 | AAU04646.1                       | SARS-CoV strain BtKY72                     | APO40579.1                       |
| SARS-CoV-2 CA-CZB-1033                 | QJQ38756.1                       | SARS-CoV A001           | AAV97984.1                       | SARS-like CoV BatCoV/BB9904/BGR/2008       | ALJ94036.1                       |
| SARS-CoV-2 France/10070SK              | QJT73010.1                       | PCoV GX-P2V             | QIQ54048.1                       | Bat CoV BM48-31/BGR/2008 (SARS-like)       | ADK66841.1                       |
| SARS-CoV-2 CA-CZB0103                  | QJE38330.1                       | PCoV GX-P4L             | QIA48614.1                       | CoV BtRI-BetaCoV/SC2018                    | QDF43815.1                       |
| SARS-CoV-2 BetaCoV/Wuhan/IPBCAMS-WH-05 | QHU36864.1                       | PCoV GX-P5L             | QIA48632.1                       | BtRs-BetaCoV/HuB2013                       | AIA62310.1                       |
| SARS-CoV-2 CruiseA-18                  | QII57278.1                       |                         |                                  | Bat SARS-CoV HKU3-1                        | AAY88866.1                       |
| SARS-CoV-2 CA-CZB-1105                 | QJS54754.1                       |                         |                                  | Bat SARS-like CoV bat-SL-CoVZC45           | AVP78031.1                       |
|                                        |                                  |                         |                                  | Bat SARS-like CoV bat-SL-CoVZXC21          | AVP78042.1                       |
|                                        |                                  |                         |                                  | Bat SARS-CoV Rf1/2004                      | ABD75323.1                       |
|                                        |                                  |                         |                                  | Bat SARS-like CoV Rf4092                   | ATO98145.1                       |
|                                        |                                  |                         |                                  | Bat CoV Anlong-103                         | ARI44799.1                       |
|                                        |                                  |                         |                                  | Bat CoV Anlong-112                         | ARI44804.1                       |
|                                        |                                  |                         |                                  | Bat SARS-CoV Rp3/2004                      | AAZ67052.1                       |
|                                        |                                  |                         |                                  | CoV BtRs-BetaCoV/YN2018C                   | QDF43830.1                       |
|                                        |                                  |                         |                                  | Bat CoV Rp/Shaanxi2011                     | AGC74165.1                       |
|                                        |                                  |                         |                                  | Bat SARS-CoV Rm1                           | ABD75332.1                       |

Table S2: GenBank accession numbers for the coronavirus sequences analysed in this study.
